# Supplementary material
Source: publisher figshare collection journal article supplement (https://future-science-group.figshare.com/ndownloader/files/28913580)
Supplement: Supplementary file 1 [file 28913580]

Table S1. Elemental analysis of D/CDs obtained from CHNO elemental analyzer.

| Element | C (%) | N (%) | O (%) | H (%) |
| --- | --- | --- | --- | --- |
| CDa | 30.7 | 23.6 | 35.2 | 10.5 |
| CDb | 35.2 | 25.3 | 30.1 | 9.4 |
| CDc | 23.6 | 25.9 | 45.4 | 5.1 |
| CDd | 32.3 | 22.4 | 43 | 2.3 |

Table S2. Elemental analysis of D/CDs obtained from EDX analysis.

| Element | C (%) | N (%) | O (%) |
| --- | --- | --- | --- |
| CDa | 24.8 | 22.0 | 43.2 |
| CDb | 37.9 | 23.7 | 38.4 |
| CDc | 25.8 | 25.5 | 48.7 |
| CDd | 29 | 25.6 | 45.4 |
